# Supplementary material
Source: publisher figshare collection journal article supplement (https://acs.figshare.com/ndownloader/files/14985965)
Supplement: Supplementary file 1 [file 14985965]

## Supporting Information

### Transition metal-modified exfoliated zirconium phosphate as an electrocatalyst for the oxygen evolution reaction

Mario V. Ramos-Garcés,<sup>1</sup> Joel Sanchez,<sup>2</sup> Daniel E. Del Toro-Pedrosa,<sup>1</sup> Isabel Barraza Alvarez,<sup>3</sup> Yanyu Wu,<sup>3</sup> Eduardo Valle,<sup>2</sup> Dino Villagrán,<sup>3</sup> Thomas F. Jaramillo,<sup>\*,2</sup> and Jorge L. Colón<sup>\*,1</sup>

<sup>1</sup> Department of Chemistry, University of Puerto Rico at Río Piedras, 17 Ave. Universidad STE 1701, San Juan, PR 00925-2537, USA

<sup>2</sup> Department of Chemical Engineering, Stanford University, Stanford, CA 94305, USA

<sup>3</sup> Department of Chemistry and Biochemistry, University of Texas at El Paso, 500 W University Ave, El Paso, TX 79968, USA

Corresponding author emails: [jorge.colon10@upr.edu](mailto:jorge.colon10@upr.edu); [jaramillo@stanford.edu](mailto:jaramillo@stanford.edu)

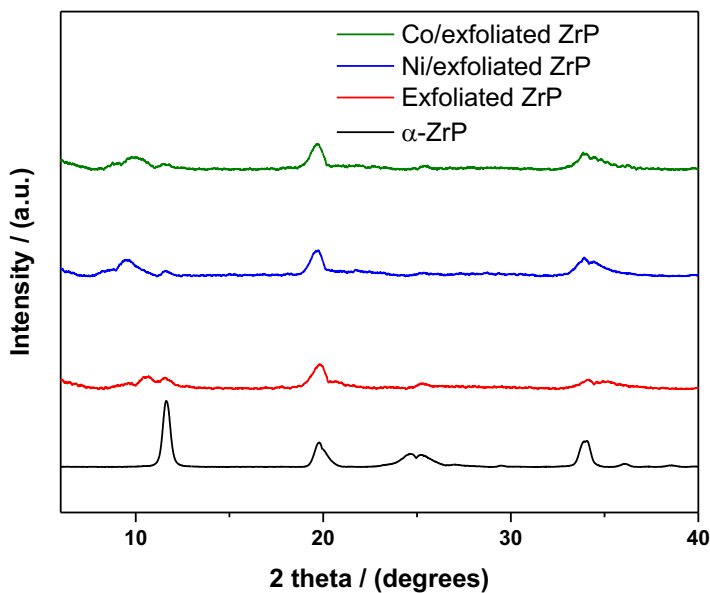

**Figure S1.** XRPD patterns of  $\alpha$ -ZrP, exfoliated ZrP, and metal-modified exfoliated ZrP samples. The XRPD patterns of the exfoliated samples are normalized to the ca. 20° peak of  $\alpha$ -ZrP.
